# Supplementary material
Source: publisher figshare collection journal article supplement (https://sage.figshare.com/ndownloader/files/14144753)

## Appendix

### Lexicographic heuristic and Luce's choice axiom as additive model

The population is infinite with three types of people: 1) Price focused ( $U_1$ ), 2) Quality focussed ( $U_2$ ), and 3) Network oriented ( $U_3$ ). Let  $p$ ,  $q$ , and  $r$  be the probability of a person selected from  $U_1$ ,  $U_2$ , and  $U_3$  respectively where  $p > 0$ ,  $q > 0$ ,  $n > 0$ , and  $p + q + n = 1$ .

At each time, one person from the population is selected and make the decision of buying the product A or B. At the time  $t=0$ , there are  $X_{a0}$  bought the product A and  $X_{b0}$  persons bought product B. Let  $X_{at}$  and  $X_{bt}$  be the number of persons ( $X_{at} + X_{bt} = X_{a0} + X_{b0} + t$ ) bought the product A & B respectively at time  $t$ .

At each time, the person will select the choice of A or B is random. Given below the distribution of choice for each group

Group  $U_1$

$$\text{Choice at } t = \begin{cases} A & \text{with probability } 1 - \alpha \\ B & \text{with probability } \alpha \end{cases}$$

Where  $\alpha = \{\chi/(\chi + \lambda)\}$  and  $\chi$  and  $\lambda$  are the prices of the two products.

Group  $U_2$

$$\text{Choice at } t = \begin{cases} A & \text{with probability } 1 - \beta \\ B & \text{with probability } \beta \end{cases}$$

Where  $\beta = \{\theta/(\omega + \theta)\}$  and  $\omega$  and  $\theta$  are the qualities of the two products

Group  $U_3$

$$\text{Choice at } t = \begin{cases} A & \text{with probability } X_{at}/(X_{a0} + X_{b0} + t) \\ B & \text{with probability } X_{bt}/(X_{a0} + X_{b0} + t) \end{cases}$$

Where  $X_{at}$  and  $X_{bt}$  are the entrant's and incumbent's installed bases at time  $t$

Let  $Z$  be unconditional choice at  $t$ . It will be a mixture of three groups and can take two values A and B. Using the law of total probability, we can write

$$P[Z = B] = P(U_1) * P[\text{ChoiceB}|U_1] + P(U_2) * P[\text{ChoiceB}|U_2] + P(U_3) * P[\text{ChoiceB}|U_3]$$

$$P[Z = B] = p\alpha + q\beta + n * X_{bt}/(X_{a0} + X_{b0} + t)$$

Which implies, at unconditional level

$$\text{Choice at } t = \begin{cases} A & \text{with probability } 1 - (p\alpha + q\beta + n * X_{bt}/(X_{a0} + X_{b0} + t)) \\ B & \text{with probability } p\alpha + q\beta + n * X_{bt}/(X_{a0} + X_{b0} + t) \end{cases}$$

We can see that  $P[Z = B]$  is a linear function of  $\alpha$ ,  $\beta$ , and  $X_{bt}/(X_{a0} + X_{b0} + t)$ . We can consider the unconditional choice at  $t$  as an additive model.

## Multiplicative Consumer Choice Model

In this model we use multiplicative structure of group level probabilities to determine the choice.

At unconditional level,

$$\text{Choice at } t = \begin{cases} A & \text{with probability } \alpha^p \beta^q [X_{bt}/(X_{a0} + X_{b0} + t)]^n \\ B & \text{with probability } 1 - \alpha^p \beta^q [X_{bt}/(X_{a0} + X_{b0} + t)]^n \end{cases}$$

## Comparison of Additive and Multiplicative Model

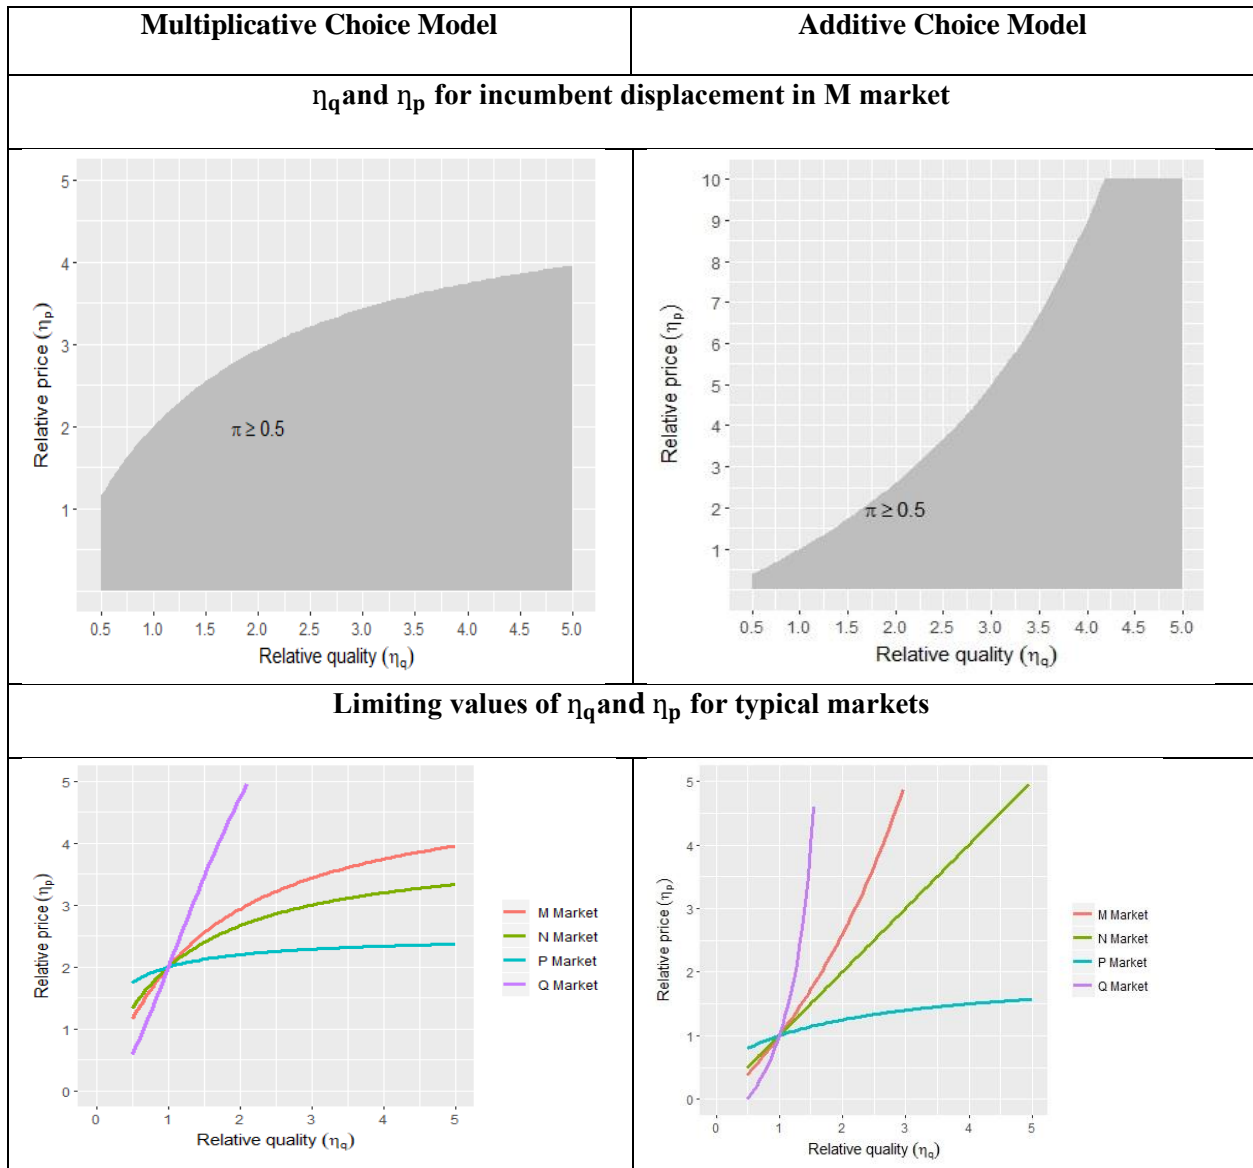

### Multiplicative Choice Model

### Additive Choice Model

$\eta_q$  and  $\eta_p$  for incumbent displacement in typical markets

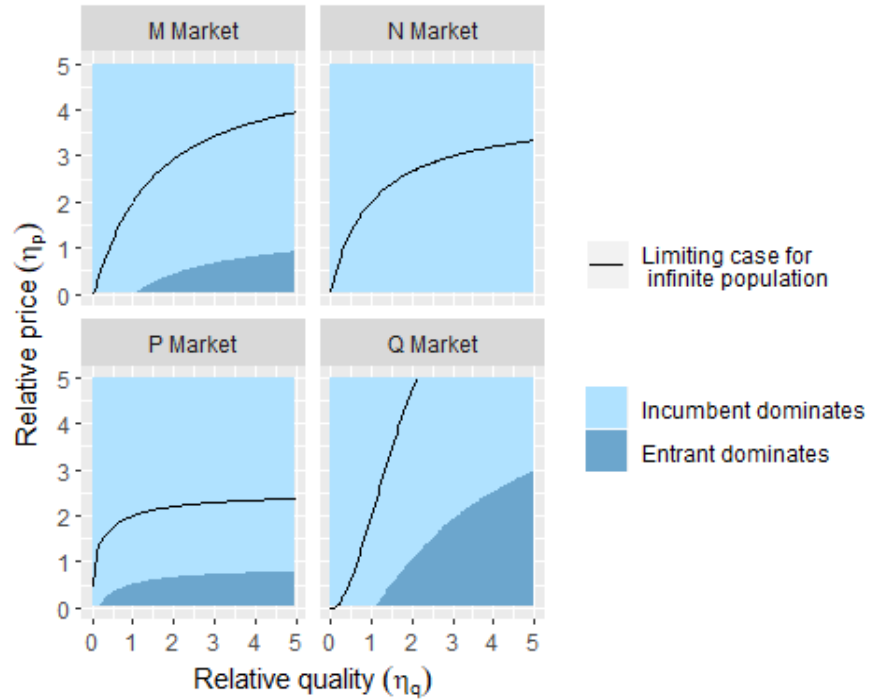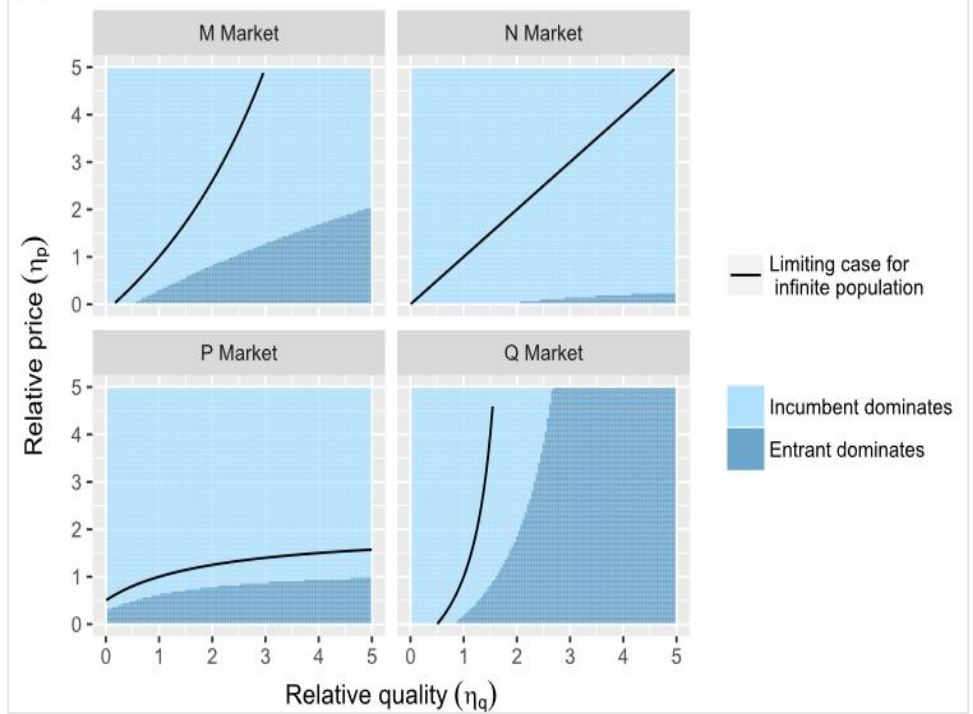

## Multiplicative Choice Model

## Additive Choice Model

Effect of seeding on  $\eta_q$  and  $\eta_p$  for incumbent displacement in typical markets

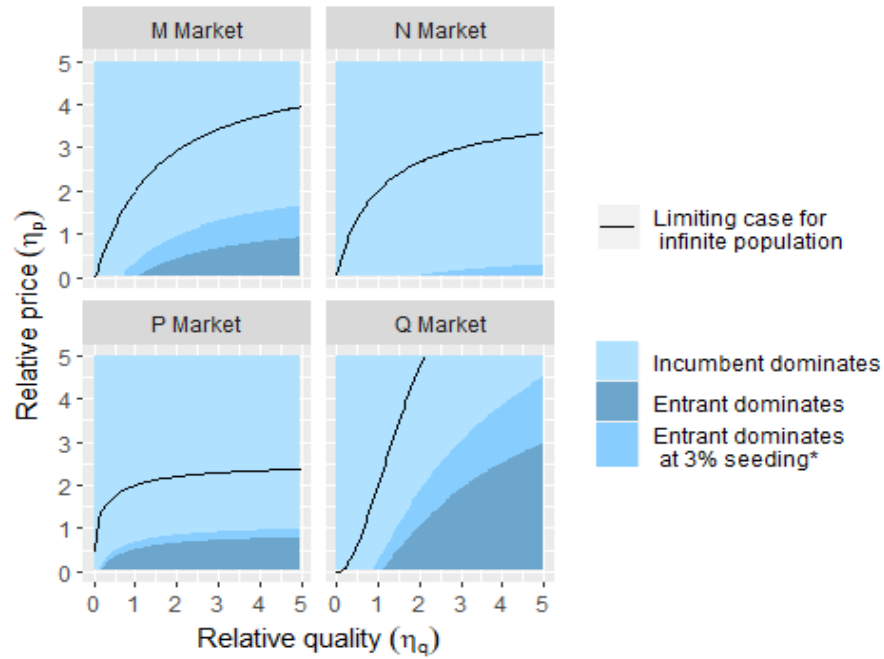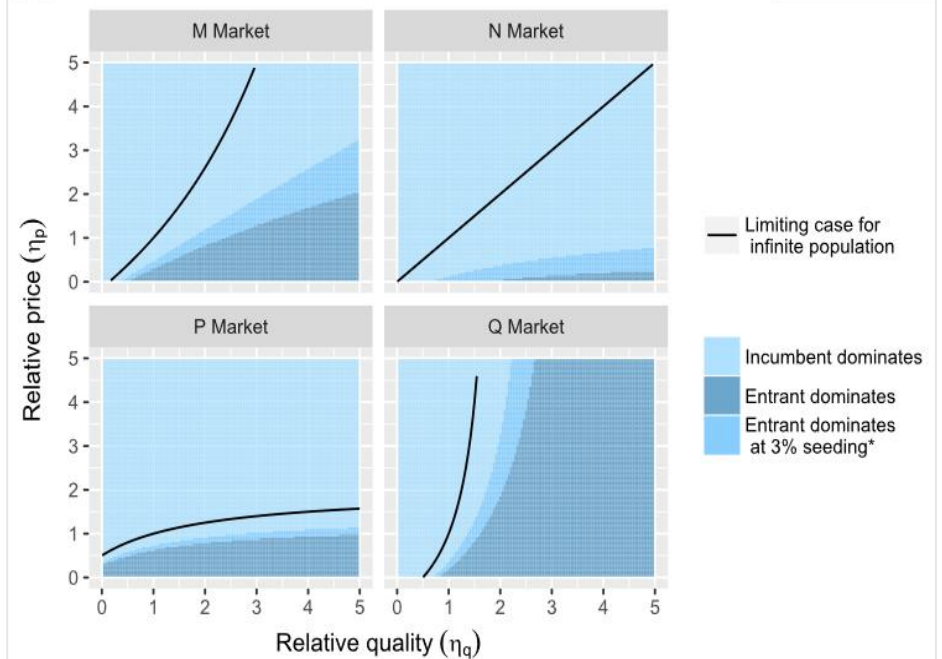

Supplement: Supplementary file 1 [file 14144753]
